# Supplementary material
Source: PubMed Central journal article supplement (PMC9204617)
Supplement: jamaoncol-e221968-s002.pdf [file jamaoncol-e221968-s002.pdf]

## Supplemental Online Content

Wang X, Zhang L, Liu X, et al. Efficacy and safety of a pegasparginase-based chemotherapy regimen vs an L-asparaginase–based chemotherapy regimen for newly diagnosed advanced extranodal natural killer/T-cell lymphoma: a randomized clinical trial. *JAMA Oncol*. Published online June 16, 2022.  
doi:10.1001/jamaoncol.2022.1968

**eFigure 1.** Subgroup analysis of PFS by key factors

**eFigure 2.** Subgroup analysis of OS by key factors

**eTable 1.** Specific treatment regimens

**eTable 2.** Treatment-related toxicities and adverse reactions

This supplemental material has been provided by the authors to give readers additional information about their work.

eFigure 1. Subgroup analysis of PFS by key factors

Abbreviations:  $\beta 2$  MG,  $\beta 2$  microglobulin; ECOG, Eastern Cooperative Oncology Group; EBV, Epstein-Barr virus; IPI, international prognostic index; LDH, lactate dehydrogenase; NUAT, non-upper aerodigestive tract; UAT, upper aerodigestive tract.

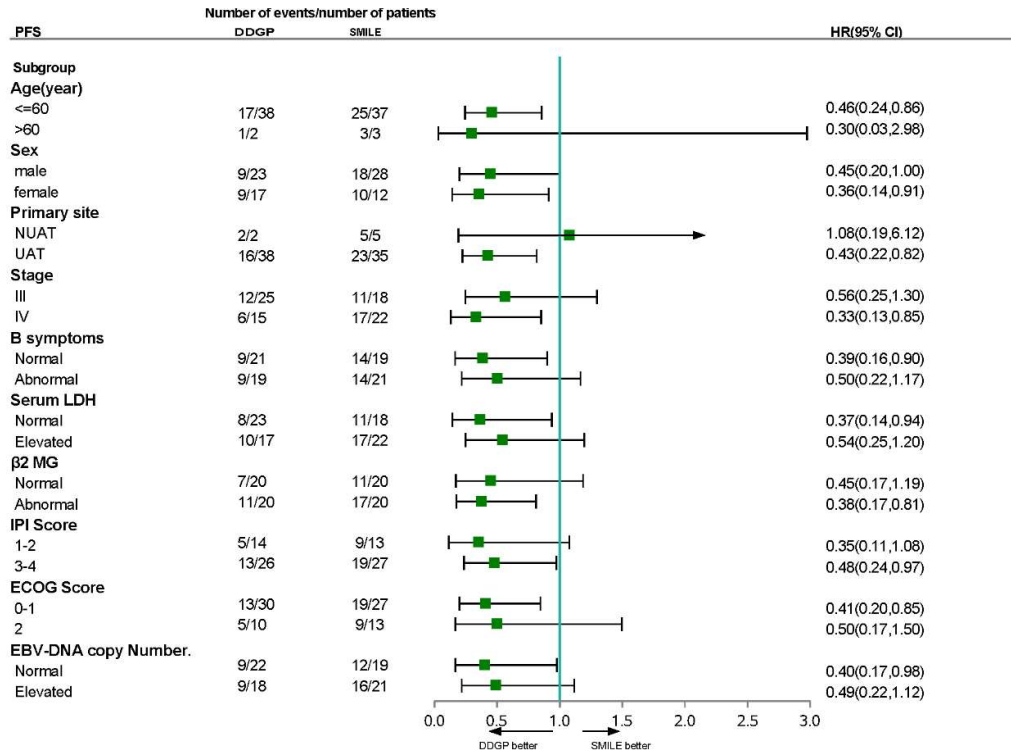

eFigure 2. Subgroup analysis of OS by key factors.

Since the limited number of patients (five) and events (four) in patients older than sixty, the hazard ratio was infinite and not present in this figure.

Abbreviations:  $\beta$ 2 MG,  $\beta$ 2 microglobulin; ECOG, Eastern Cooperative Oncology Group; EBV, Epstein-Barr virus; IPI, international prognostic index; LDH, lactate dehydrogenase; NUAT, non-upper aerodigestive tract UAT, upper aerodigestive tract.

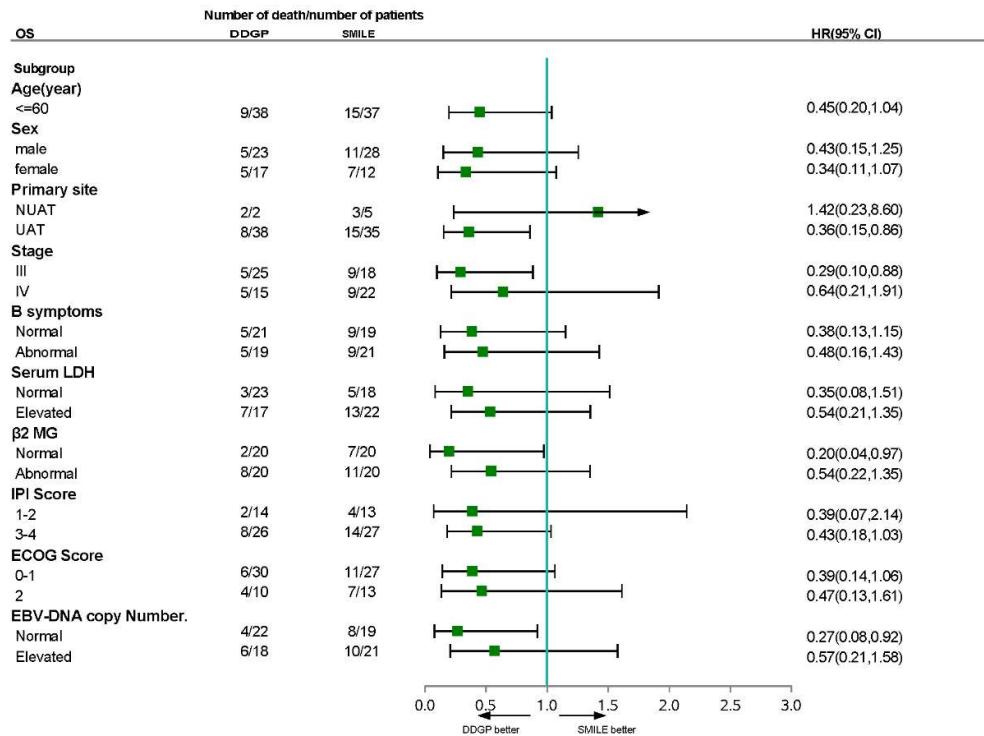

eTable 1. Specific treatment regimens

|               | Dosage                                                  | Usage                      | Time      |
|---------------|---------------------------------------------------------|----------------------------|-----------|
| DDGP regimen  |                                                         |                            |           |
| DDP           | 20 mg/m <sup>2</sup>                                    | ivgtt                      | d1–4      |
| DEX           | 15 mg/m <sup>2</sup>                                    | ivgtt                      | d1–5      |
| GEM           | 800 mg/m <sup>2</sup>                                   | ivgtt                      | d1 and d8 |
| Peg-Asp       | 2500 IU/m <sup>2</sup><br>(up to a maximum of 3750 IU)  | im                         | d1        |
| SMILE regimen |                                                         |                            |           |
| MTX           | 2 g/m <sup>2</sup>                                      | 20% iv, 2h; 80% ivgtt, 4 h | d1        |
| DEX           | 40 mg                                                   | ivgtt                      | d2–4      |
| IFO           | 1.5 g/m <sup>2</sup>                                    | ivgtt                      | d2–4      |
| L-ASP         | 6000 U/m <sup>2</sup><br>(up to a maximum of 10,000 IU) | ivgtt                      | d3–9      |
| VP-16         | 100 mg/m <sup>2</sup>                                   | ivgtt                      | d2–4      |

Abbreviations: DDP, cisplatin; DEX, dexamethasone; GEM, gemcitabine; IFO, ifosfamide; IM, intramuscularly; IV, intravenously; Ivgtt, intravenously guttae; L-Asp, L-asparaginase; MTX, methotrexate; PEG-Asp, pegasparaginase; VP-16, etoposide.

Note: In the SMILE regimen, leucovorin was administered from 12 h after the initiation of methotrexate, 21 mg for the first time, 15 mg for the next time, q6h for a total of 12 times. Blood drug concentration of MTX was measured 24 h (< 10 mmol/L), 48 h (<1 mmol/L), and 72 h (< 0.1 mmol/L) after the use of MTX.

eTable 2. Treatment-related toxicities and adverse reactions

|                          | DDGP(N=40) |            |            | SMILE (N=40) |            |            |
|--------------------------|------------|------------|------------|--------------|------------|------------|
|                          | 0          | grade 1-2  | 3-4        | 0            | grade 1-2  | 3-4        |
| <b>Adverse Reactions</b> | <b>0</b>   | <b>1-2</b> | <b>3-4</b> | <b>0</b>     | <b>1-2</b> | <b>3-4</b> |
| Hematologic              |            |            |            |              |            |            |
| Leukopenia*              | 0          | 15 (37.5)  | 25 (62.5)  | 0            | 6 (15.0)   | 34 (85.0)  |
| Neutropenia*             | 0          | 14 (35.0)  | 26 (65.0)  | 0            | 6 (15.0)   | 34 (85.0)  |
| Anemia                   | 0          | 26 (65.0)  | 14 (35.0)  | 1 (2.5)      | 30 (75.0)  | 9 (22.5)   |
| Thrombocytopenia         | 3 (7.5)    | 19 (47.5)  | 18 (45.0)  | 3 (7.5)      | 16 (40.0)  | 21 (52.5)  |
| Nonhematologic           |            |            |            |              |            |            |
| Prolonged APTT           | 27 (67.5)  | 13 (32.5)  | 0          | 24 (60.0)    | 16 (40.0)  | 0          |
| Hypofibrinogenemia       | 26 (65.0)  | 14 (35.0)  | 0          | 27 (67.5)    | 13 (32.5)  | 0          |
| Prothrombin time         | 32 (80.0)  | 8 (20.0)   | 0          | 34 (85.0)    | 6 (15.0)   | 0          |
| Hyperbilirubinemia       | 38 (95.0)  | 2 (5.0)    | 0          | 35 (87.5)    | 4 (10.0)   | 0          |
| Transaminase*            | 25 (62.5)  | 15 (37.5)  | 0          | 16 (40.0)    | 18 (45.0)  | 5 (12.5)   |
| Creatinine               | 39 (97.5)  | 1 (2.5)    | 0          | 40 (100.0)   | 0          | 0          |
| BUN                      | 39 (97.5)  | 1 (2.5)    | 0          | 39 (97.5)    | 1 (2.5)    | 0          |

|                          |            | <b>DDGP<br/>(N=40)</b> |            |           | <b>SMILE<br/>(N=40)</b> |            |
|--------------------------|------------|------------------------|------------|-----------|-------------------------|------------|
|                          |            | <b>grade</b>           |            |           | <b>grade</b>            |            |
| <b>Adverse Reactions</b> | <b>0</b>   | <b>1</b>               | <b>3-4</b> | <b>0</b>  | <b>1</b>                | <b>3-4</b> |
|                          |            | -                      |            |           | -                       |            |
|                          |            | 2                      |            |           | 2                       |            |
| Nausea and vomiting      | 4 (10.0)   | 28 (70.0)              | 8 (20.0)   | 3 (7.5)   | 31 (77.5)               | 6 (15.0)   |
| Mucositis*               | 40 (100.0) | 0                      | 0          | 27 (67.5) | 10 (25.0)               | 3 (7.5)    |
| Allergy*                 | 39 (97.5)  | 1 (2.5)                | 0          | 31 (77.5) | 6 (15.0)                | 3 (7.5)    |
| Arrhythmia               | 40 (100.0) | 0                      | 0          | 39 (97.5) | 1 (2.5)                 | 0          |
| Pancreatitis             | 40 (100.0) | 0                      | 0          | 38 (95.0) | 2 (5.0)                 | 0          |

Note: 7 patients in SMILE regimen group reported treatment-related death (6 cases were grade 4 neutropenia induced and 1 case was severe thrombopenia induced). One patient in DDGP regimen group reported treatment-related death (cerebral hemorrhage induced).

\* Where the difference of grade 3-4 adverse events between two groups were statistically significant ( $P < 0.05$ ). All the rest were not significantly different ( $P > 0.05$ ).

Abbreviations: APTT, Activated partial thromboplastin time; BUN, blood urea nitrogen.
